# Supplementary material
Source: ML conference proceedings conference paper supplement (https://proceedings.neurips.cc/paper_files/paper/2017/hash/ef0d3930a7b6c95bd2b32ed45989c61f-Abstract.html)
Supplement: Supplementary file [file ef0d3930a7b6c95bd2b32ed45989c61f-Supplemental.zip]

---

# Appendix: On the Model Shrinkage Effect of Gamma Process Edge Partition Models

---

Iku Ohama<sup>\*‡</sup>      Issei Sato<sup>†</sup>      Takuya Kida<sup>‡</sup>      Hiroki Arimura<sup>‡</sup>  
<sup>\*</sup>Panasonic Corp., Japan    <sup>†</sup>The Univ. of Tokyo, Japan    <sup>‡</sup>Hokkaido Univ., Japan  
 ohama.iku@jp.panasonic.com    sato@k.u-tokyo.ac.jp    {kida,arim}@ist.hokudai.ac.jp

## A Gibbs Samplers for the EPM

### A.1 Model Description

The full description of the generative model for the EPM [1] is described as follows:

$$x_{i,j} = \mathbb{I}(m_{i,j,\cdot} \geq 1), \quad m_{i,j,\cdot} | \mathbf{U}, \mathbf{V}, \boldsymbol{\lambda} \sim \text{Poisson} \left( \sum_{k=1}^K U_{i,k} V_{j,k} \lambda_k \right),$$

$$U_{i,k} \sim \text{Gamma}(a_1, b_1), \quad V_{j,k} \sim \text{Gamma}(a_2, b_2), \quad \lambda_k \sim \text{Gamma}(\gamma_0/T, c_0). \quad (9)$$

### A.2 Closed-form Gibbs Samplers

Posterior inference for all parameters and hyperparameters of the EPM can be performed using Gibbs sampler.

**Sampling  $\mathbf{m}$ :** From Eq. (9), as  $m_{i,j,\cdot} = 0$  if and only if  $x_{i,j} = 0$ , posterior sampling of  $\mathbf{m}$  is required only for non-zero entries ( $x_{i,j} = 1$ ), and can be performed using zero-truncated Poisson (ZTP) distribution [2] as follows:

$$m_{i,j,\cdot} | \mathbf{U}, \boldsymbol{\lambda}, \mathbf{V} \sim \begin{cases} \delta(0) & \text{if } x_{i,j} = 0, \\ \text{ZTP}(\sum_{k=1}^T U_{i,k} \lambda_k V_{j,k}) & \text{if } x_{i,j} = 1. \end{cases} \quad (10)$$

Then, latent count  $m_{i,j,k}$  related to the  $k$ -th atom can be obtained by partitioning  $m_{i,j,\cdot}$  into  $T$  atoms as

$$\{m_{i,j,k}\}_{k=1}^T | m_{i,j,\cdot}, \mathbf{U}, \boldsymbol{\lambda}, \mathbf{V} \sim \text{Multinomial} \left( m_{i,j,\cdot}; \left\{ \frac{U_{i,k} \lambda_k V_{j,k}}{\sum_{k'=1}^T U_{i,k'} \lambda_{k'} V_{j,k'}} \right\}_{k=1}^T \right). \quad (11)$$

**Sampling  $\mathbf{U}, \mathbf{V}, \boldsymbol{\lambda}$ :** As the generative model for  $m_{i,j,k}$  can be given as  $m_{i,j,k} | \mathbf{U}, \mathbf{V}, \boldsymbol{\lambda} \sim \text{Poisson}(U_{i,k} V_{j,k} \lambda_k)$ , according to the additive property of the Poisson distributions, generative models for aggregated counts also can be expressed as follows:

$$m_{i,\cdot,k} = (\sum_j m_{i,j,k}) | \mathbf{U}, \mathbf{V}, \boldsymbol{\lambda} \sim \text{Poisson}(U_{i,k} (\sum_j V_{j,k}) \lambda_k), \quad (12)$$

$$m_{\cdot,j,k} = (\sum_i m_{i,j,k}) | \mathbf{U}, \mathbf{V}, \boldsymbol{\lambda} \sim \text{Poisson}((\sum_i U_{i,k}) V_{j,k} \lambda_k), \quad (13)$$

$$m_{\cdot,\cdot,k} = (\sum_i \sum_j m_{i,j,k}) | \mathbf{U}, \mathbf{V}, \boldsymbol{\lambda} \sim \text{Poisson}((\sum_i U_{i,k}) (\sum_j V_{j,k}) \lambda_k). \quad (14)$$

Therefore, thanks to the conjugacy between Poisson and gamma distributions, posterior samplers for  $\mathbf{U}$ ,  $\mathbf{V}$ , and  $\boldsymbol{\lambda}$  are straightforwardly derived as follows:

$$U_{i,k} | - \sim \text{Gamma}(a_1 + m_{i,\cdot,k}, b_1 + (\sum_j V_{j,k}) \lambda_k), \quad (15)$$

$$V_{j,k} | - \sim \text{Gamma}(a_2 + m_{\cdot,j,k}, b_2 + (\sum_i U_{i,k}) \lambda_k), \quad (16)$$

$$\lambda_k | - \sim \text{Gamma}(\gamma_0/T + m_{\cdot,\cdot,k}, c_0 + (\sum_i U_{i,k}) (\sum_j V_{j,k})). \quad (17)$$

### A.3 Sampling Hyperparameters

**Sampling  $b_1, b_2, c_0$ :** Thanks to the conjugacy between gamma distributions, posterior samplers for  $b_1$ ,  $b_2$ , and  $c_0$  are straightforwardly performed as follows:

$$b_1 | - \sim \text{Gamma}(e_0 + ITa_1, f_0 + \sum_i \sum_k \phi_{i,k}), \quad (18)$$

$$b_2 | - \sim \text{Gamma}(e_0 + JTa_2, f_0 + \sum_j \sum_k \psi_{j,k}), \quad (19)$$

$$c_0 | - \sim \text{Gamma}(e_0 + \gamma_0, f_0 + \sum_k \lambda_k). \quad (20)$$

For the remaining hyperparameters (i.e.,  $a_1$ ,  $a_2$ , and  $\gamma_0$ ), we can construct closed-form Gibbs samplers using data augmentation techniques [3, 1, 4, 5], that consider an expanded probability over target and some auxiliary variables. The key strategy is the use of the following expansions:

$$\frac{\Gamma(u)}{\Gamma(u+n)} = \frac{B(u, n)}{\Gamma(n)} = \Gamma(n)^{-1} \int_0^1 v^{u-1} (1-v)^{n-1} dv, \quad (21)$$

$$\frac{\Gamma(u+n)}{\Gamma(u)} = \sum_{w=0}^n S(n, w) u^w, \quad (22)$$

where  $B(\cdot, \cdot)$  is the beta function and  $S(\cdot, \cdot)$  is the Stirling number of the first kind.

**Sampling  $a_1, a_2$ :** For shape parameter  $a_1$ , marginalizing  $\mathbf{U}$  from Eq. (12), we have a partially marginalized likelihood related to target variable  $a_1$  as:

$$P(\{m_{i,\cdot,k}\}_{i,k} | \mathbf{V}, \boldsymbol{\lambda}) \propto \prod_{k=1}^T \left\{ \left( \frac{b_1}{b_1 + (\sum_j V_{j,k}) \lambda_k} \right)^{Ia_1} \prod_{i=1}^I \frac{\Gamma(a_1 + m_{i,\cdot,k})}{\Gamma(a_1)} \right\}. \quad (23)$$

Therefore, expanding Eq. (23) using Eq. (22) and assuming gamma prior as  $a_1 \sim \text{Gamma}(e_0, f_0)$ , posterior sampling for  $a_1$  can be performed as follows:

$$w_{i,k} | - \sim \text{Antoniak}(m_{i,\cdot,k}, a_1), \quad (24)$$

$$a_1 | - \sim \text{Gamma} \left( e_0 + \sum_i \sum_k w_{i,k}, f_0 - I \times \sum_k \ln \frac{b_1}{b_1 + (\sum_j V_{j,k}) \lambda_k} \right), \quad (25)$$

where  $\text{Antoniak}(m_{i,\cdot,k}, a_1)$  is an Antoniak distribution [6]. This is the distribution of the number of occupied tables if  $m_{i,\cdot,k}$  customers are assigned to one of an infinite number of tables using the Chinese restaurant process (CRP) [7, 8] with concentration parameter  $a_1$ , and is sampled as  $w_{i,k} = \sum_{p=1}^{m_{i,\cdot,k}} w_{i,k,p}$ ,  $w_{i,k,p} \sim \text{Bernoulli} \left( \frac{a_1}{a_1 + p - 1} \right)$ . Similarly, posterior sampler for  $a_2$  can be derived from Eqs. (13) and (22) (omitted for brevity).

**Sampling  $\gamma_0$ :** Similar to the samplers for  $a_1$  and  $a_2$ , according to Eqs. (14) and (22),  $\gamma_0$  can be updated as follows:

$$w_k | - \sim \text{Antoniak}(m_{\cdot,\cdot,k}, \gamma_0/T), \quad (26)$$

$$\gamma_0 | - \sim \text{Gamma} \left( e_0 + \sum_k w_k, f_0 - \frac{1}{T} \sum_k \ln \frac{c_0}{c_0 + (\sum_i U_{i,k})(\sum_j V_{j,k})} \right). \quad (27)$$

## B Gibbs Samplers for the CEPm

Posterior inference for the CEPm can be performed using Gibbs sampler as same as that for the EPM. However, only  $a_1$  and  $a_2$  do not have closed-form sampler because of introduced constraints  $b_1 = C_1 \times a_1$  and  $b_2 = C_2 \times a_2$ . Therefore, instead of sampling from true posterior, we use the grid Gibbs sampler [9] to sample from a discrete probability distribution

$$P(a_1 | -) \propto \text{Eq (23)} \times P(a_1) \quad (28)$$

over a grid of points  $\frac{1}{1+a_1} = 0.01, 0.02, \dots, 0.99$ . Note that  $a_2$  can be sampled in a same way as  $a_1$  (omitted for brevity).

## C Gibbs Samplers for the DEPM

### C.1 Closed-form Gibbs Samplers

**Sampling  $\phi, \psi$ :** Given  $m_{\cdot, \cdot, k} = \sum_i \sum_j m_{i,j,k}$ , generative process for latent count  $m_{i, \cdot, k}$  can be expressed as

$$\{m_{i, \cdot, k}\}_{i=1}^I | m_{\cdot, \cdot, k}, \phi, \psi, \lambda \sim \text{Multinomial}(m_{\cdot, \cdot, k}; \{\phi_{i,k}\}_{i=1}^I). \quad (29)$$

Thanks to conjugacy between Eq. (29) and Dirichlet prior in Eq. (4), posterior sampling for  $\phi$  can be performed as

$$\{\phi_{i,k}\}_{i=1}^I | - \sim \text{Dirichlet}(\{\alpha_1 + m_{i, \cdot, k}\}_{i=1}^I). \quad (30)$$

Similarly,  $\psi$  can be updated as

$$\{\psi_{j,k}\}_{j=1}^J | - \sim \text{Dirichlet}(\{\alpha_2 + m_{\cdot, j, k}\}_{j=1}^J). \quad (31)$$

**Sampling  $m, \lambda$ :** Posterior samplers for remaining latent variables  $m$  and  $\lambda$  are straightforwardly given from Eqs. (10), (11), and (17) by replacing  $U$  and  $V$  with  $\phi$  and  $\psi$ , respectively.

### C.2 Sampling Hyperparameters

**Sampling  $\alpha_1, \alpha_2$ :** Similar to Appendix A.3, marginalizing  $\phi$  out from Eq. (4) and expanding the marginal likelihood using Eqs. (21) and (22), posterior sampling for  $\alpha_1$  can be derived as follows:

$$v_{1,k} | - \sim \text{Beta}(I\alpha_1, m_{\cdot, \cdot, k}), \quad (32)$$

$$w_{1,i,k} | - \sim \text{Antoniak}(m_{i, \cdot, k}, \alpha_1), \quad (33)$$

$$\alpha_1 | - \sim \text{Gamma}(e_0 + \sum_i \sum_k w_{1,i,k}, f_0 - I \times \sum_k \ln v_{1,k}). \quad (34)$$

Note that the posterior sampler for  $\alpha_2$  can be derived in same way (omitted for brevity).

**Sampling  $\gamma_0, c_0$ :** The remaining hyperparameters (i.e.,  $\gamma_0$  and  $c_0$ ) can be updated as same as in the EPM. Similar to the sampler for the EPM,  $c_0$  can be updated using Eq. (20). Finally, posterior sampler for  $\gamma_0$  can be derived as

$$w_k | - \sim \text{Antoniak}(m_{\cdot, \cdot, k}, \gamma_0/T), \quad (35)$$

$$\gamma_0 | - \sim \text{Gamma}\left(e_0 + \sum_k w_k, f_0 - \ln \frac{c_0}{c_0 + 1}\right). \quad (36)$$

## D Proof of Theorem 4

Considering a joint distribution for  $m_{i,j, \cdot}$  customers and their assignments  $z_{i,j} = \{z_{i,j,s}\}_{s=1}^{m_{i,j, \cdot}} \in \{1, \dots, T\}^{m_{i,j, \cdot}}$  to  $T$  tables, we have following lemma for the truncated DEPM:

**Lemma 1.** *The joint distribution over  $m$  and  $z$  for the DEPM is expressed by a fully factorized form as*

$$P(m, z | \phi, \psi, \lambda) = \prod_{i=1}^I \prod_{j=1}^J \frac{1}{m_{i,j, \cdot}!} \times \prod_{i=1}^I \prod_{k=1}^T \phi_{i,k}^{m_{i, \cdot, k}} \times \prod_{j=1}^J \prod_{k=1}^T \psi_{j,k}^{m_{\cdot, j, k}} \times \prod_{k=1}^T \lambda_k^{m_{\cdot, \cdot, k}} e^{-\lambda_k}. \quad (37)$$

*Proof.* As the likelihood functions  $P(m_{i,j, \cdot} | \phi, \psi, \lambda)$  and  $P(z_{i,j,s} | m_{i,j, \cdot}, \phi, \psi, \lambda)$  are given as

$$P(m_{i,j, \cdot} | \phi, \psi, \lambda) = \frac{1}{m_{i,j, \cdot}!} \left( \sum_{k=1}^T \phi_{i,k} \psi_{j,k} \lambda_k \right)^{m_{i,j, \cdot}} e^{-\sum_{k=1}^T \phi_{i,k} \psi_{j,k} \lambda_k}, \quad (38)$$

$$P(z_{i,j,s} = k^* | m_{i,j, \cdot}, \phi, \psi, \lambda) = \frac{\phi_{i,k^*} \psi_{j,k^*} \lambda_{k^*}}{\sum_{k'=1}^T \phi_{i,k'} \psi_{j,k'} \lambda_{k'}}, \quad (39)$$

respectively, we obtain the joint likelihood function for  $\mathbf{m}$  and  $\mathbf{z}$  as follows:

$$\begin{aligned}
P(\mathbf{m}, \mathbf{z} | \phi, \psi, \lambda) &= \prod_{i=1}^I \prod_{j=1}^J \left\{ P(m_{i,j,\cdot} | \phi, \psi, \lambda) \prod_{s=1}^{m_{i,j,\cdot}} P(z_{i,j,s} | m_{i,j,\cdot}, \phi, \psi, \lambda) \right\} \\
&= \prod_{i=1}^I \prod_{j=1}^J \frac{1}{m_{i,j,\cdot}!} \times \prod_{i=1}^I \prod_{k=1}^T \phi_{i,k}^{m_{i,\cdot,k}} \times \prod_{j=1}^J \prod_{k=1}^T \psi_{j,k}^{m_{\cdot,j,k}} \times \prod_{k=1}^T \lambda_k^{m_{\cdot,\cdot,k}} e^{-\lambda_k (\sum_i \phi_{i,k}) (\sum_j \psi_{j,k})}.
\end{aligned} \tag{40}$$

Thanks to the  $l_1$ -constraints for  $\phi$  and  $\psi$  we introduced in Eq. (3), substituting  $\sum_i \phi_{i,k} = \sum_j \psi_{j,k} = 1$  for Eq. (40), we obtain Eq. (37) in Lemma 1.  $\square$

Thanks to the conjugacy between Eq. (37) in Lemma 1 and prior construction in Eq. (4), marginalizing  $\phi$ ,  $\psi$ , and  $\lambda$  out, we obtain the following marginal likelihood for the DEPM:

$$\begin{aligned}
P(\mathbf{m}, \mathbf{z}) &= \prod_{i=1}^I \prod_{j=1}^J \frac{1}{m_{i,j,\cdot}!} \times \prod_{k=1}^T \frac{\Gamma(I\alpha_1)}{\Gamma(I\alpha_1 + m_{\cdot,\cdot,k})} \prod_{i=1}^I \frac{\Gamma(\alpha_1 + m_{i,\cdot,k})}{\Gamma(\alpha_1)} \\
&\quad \times \prod_{k=1}^T \frac{\Gamma(J\alpha_2)}{\Gamma(J\alpha_2 + m_{\cdot,\cdot,k})} \prod_{j=1}^J \frac{\Gamma(\alpha_2 + m_{\cdot,j,k})}{\Gamma(\alpha_2)} \times \prod_{k=1}^T \frac{\Gamma(\frac{\gamma_0}{T} + m_{\cdot,\cdot,k}) c_0^{\frac{\gamma_0}{T}}}{\Gamma(\frac{\gamma_0}{T}) (c_0 + 1)^{\frac{\gamma_0}{T} + m_{\cdot,\cdot,k}}}.
\end{aligned} \tag{41}$$

Considering a partition  $[\mathbf{z}]$  instead of the assignments  $\mathbf{z}$  as same as in [10], the marginal likelihood function  $P(\mathbf{m}, [\mathbf{z}])$  for a partition of the truncated DEPM can be expressed as

$$\begin{aligned}
P(\mathbf{m}, [\mathbf{z}]) &= \frac{T!}{(T - K_+)!} P(\mathbf{m}, \mathbf{z}) \\
&= \prod_{i=1}^I \prod_{j=1}^J \frac{1}{m_{i,j,\cdot}!} \times \prod_{k=1}^{K_+} \frac{\Gamma(I\alpha_1)}{\Gamma(I\alpha_1 + m_{\cdot,\cdot,k})} \prod_{i=1}^I \frac{\Gamma(\alpha_1 + m_{i,\cdot,k})}{\Gamma(\alpha_1)} \\
&\quad \times \prod_{k=1}^{K_+} \frac{\Gamma(J\alpha_2)}{\Gamma(J\alpha_2 + m_{\cdot,\cdot,k})} \prod_{j=1}^J \frac{\Gamma(\alpha_2 + m_{\cdot,j,k})}{\Gamma(\alpha_2)} \\
&\quad \times \frac{T!}{(T - K_+)! T^{K_+}} \times \gamma_0^{K_+} \left( \frac{c_0}{c_0 + 1} \right)^{\gamma_0} \prod_{k=1}^{K_+} \frac{\prod_{l=1}^{m_{\cdot,\cdot,k}-1} (l + \gamma_0/T)}{(c_0 + 1)^{m_{\cdot,\cdot,k}}}.
\end{aligned} \tag{42}$$

Therefore, taking  $T \rightarrow \infty$  in Eq. (42), we obtain the marginal likelihood function for the truly infinite DEPM (i.e., IDEPM) as in Eq. (5) of Theorem 4.

## E Sampling Hyperparameters for the IDEPM

**Sampling  $\alpha_1, \alpha_2$ :** Posterior samplers for  $\alpha_1$  and  $\alpha_2$  of the IDEPM are equivalent to those of the truncated DEPM as in Appendix C.2.

**Sampling  $\gamma_0$ :** From Eq. (5), we straightforwardly obtain the posterior sampler for  $\gamma_0$  as

$$\gamma_0 | - \sim \text{Gamma} \left( e_0 + K_+, f_0 - \ln \frac{c_0}{c_0 + 1} \right). \tag{43}$$

Note that  $\gamma_0$  in Eq. (5) can be marginalized out assuming gamma prior. However, we explicitly sample  $\gamma_0$  for simplicity in this paper.

**Sampling  $c_0$ :** As derived in Sec. 4.3 of main article,  $c_0$  is updated as

$$\lambda_k | - \sim \text{Gamma}(m_{\cdot,\cdot,k}, c_0 + 1) \quad k \in \{1, \dots, K_+\}, \tag{44}$$

$$\lambda_{\gamma_0} | - \sim \text{Gamma}(\gamma_0, c_0 + 1), \tag{45}$$

$$c_0 | - \sim \text{Gamma}(e_0 + \gamma_0, f_0 + \lambda_{\gamma_0} + \sum_{k=1}^{K_+} \lambda_k). \tag{46}$$

## References

- [1] Mingyuan Zhou. “Infinite Edge Partition Models for Overlapping Community Detection and Link Prediction”. In: *Proc. AISTATS*. Vol. 38. 2015, pp. 1135–1143.
- [2] Charles J. Geyer. *Lower-Truncated Poisson and Negative Binomial Distributions*. Tech. rep. Working Paper Written for the Software R. University of Minnesota, MN (available: <http://cran.r-project.org/web/packages/aster/vignettes/trunc.pdf>), 2007.
- [3] Michael D. Escobar and Mike West. “Bayesian Density Estimation and Inference Using Mixtures”. In: *J. Am. Stat. Assoc.* 90 (1994), pp. 577–588.
- [4] Yee Whye Teh, Michael I. Jordan, Matthew J. Beal, and David M. Blei. “Hierarchical Dirichlet Processes”. In: *J. Am. Stat. Assoc.* 101.476 (2006), pp. 1566–1581.
- [5] David Newman, Arthur U. Asuncion, Padhraic Smyth, and Max Welling. “Distributed Algorithms for Topic Models”. In: *J. Mach. Learn. Res.* 10 (2009), pp. 1801–1828.
- [6] Charles E. Antoniak. “Mixtures of Dirichlet Processes with Applications to Bayesian Nonparametric Problems”. In: *The Annals of Statistics* 2.6 (1974), pp. 1152–1174.
- [7] David Blackwell and James B. MacQueen. “Ferguson distributions via Polya urn schemes”. In: *The Annals of Statistics* 1 (1973), pp. 353–355.
- [8] David Aldous. “Exchangeability and related topics”. In: *Ecole d’Ete de Probabilities de Saint-Flour XIII*. 1985, pp. 1–198.
- [9] Mingyuan Zhou. “Beta-Negative Binomial Process and Exchangeable Random Partitions for Mixed-Membership Modeling”. In: *Proc. NIPS*. 2014, pp. 3455–3463.
- [10] Thomas L. Griffiths and Zoubin Ghahramani. “The Indian Buffet Process: An Introduction and Review”. In: *J. Mach. Learn. Res.* 12 (2011), pp. 1185–1224.
